# Supplementary material for: On-demand activatable peroxidase-mimicking enzymatic polymer nanocomposite films
Source: Royal Society of Chemistry journal article supplement (doi:10.1039/d4tb00755g), 2024-01-01
Supplement: d4tb00755g1.pdf [file d4tb00755g1.pdf]

## Supplementary Information

### On-demand activatable peroxidase-mimicking enzymatic polymer nanocomposite films

Md. Lutful Amin,<sup>a</sup> Ayad Saeed,<sup>b,c</sup> Le N. M. Dinh,<sup>a</sup> Jiachen Yan,<sup>b</sup> Haotian Wen,<sup>b</sup> Shery L. Y. Chang,<sup>b,d</sup> Yin Yao,<sup>d</sup> Per B. Zetterlund,<sup>a</sup> Tushar Kumeria,<sup>b,c,e\*</sup> Vipul Agarwal<sup>a\*</sup>

<sup>a</sup>Cluster for Advanced Macromolecular Design (CAMD), School of Chemical Engineering, University of New South Wales, Sydney, NSW 2052, Australia

<sup>b</sup>School of Materials Science and Engineering, University of New South Wales, Sydney, NSW 2052, Australia

<sup>c</sup>Australian Centre for Nanomedicine, University of New South Wales, Sydney, NSW 2052, Australia

<sup>d</sup>Mark Wainwright Analytical Centre, University of New South Wales, Sydney, NSW 2052, Australia

<sup>e</sup>School of Pharmacy, University of Queensland, Brisbane, QLD 4102, Australia

\*Corresponding authors: t.kumeria@unsw.edu.au, agarwalvipul84@gmail.com

**Table S1:** Particle size analyses of iron oxide nanoparticles.

| Sample                   | Average Size (nm) | PDI    |
|--------------------------|-------------------|--------|
| Iron oxide nanoparticles | 127               | 0.0556 |

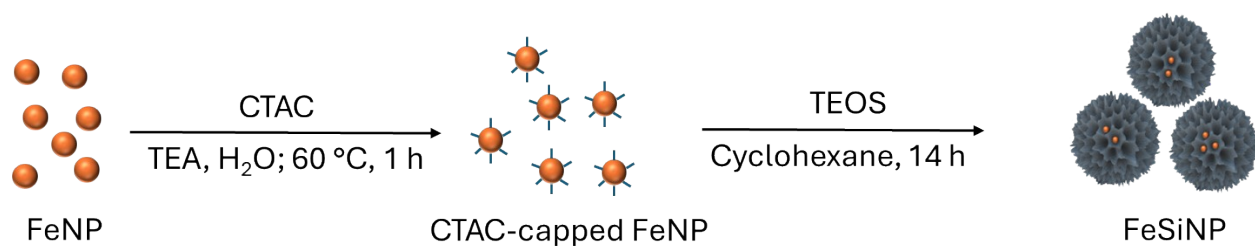

**Figure S1.** FeSiNP: synthesis of mesoporous silica nanoparticles and decoration with iron oxide nanoparticles.

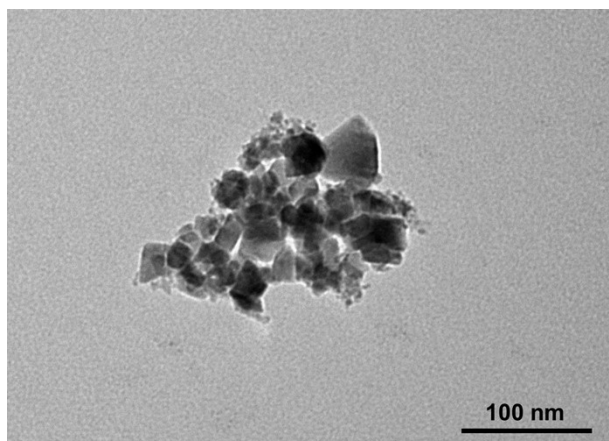

**Figure S2.** Characterisation of iron oxide nanoparticles by STEM (scale bar = 100 nm).

**Table S2:** Monomer conversion and particle size analyses of polymer latex.

| <b>P(St-<i>stat</i>-nBA)/FeSiNP</b>       | <b>5 wt%</b> | <b>10 wt%</b> | <b>20 wt%</b> |
|-------------------------------------------|--------------|---------------|---------------|
| Conversion (%)                            | 85.4         | 85.4          | 90.6          |
| Intensity-average particle size ( $d_i$ ) | 85.0         | 88.9          | 82.0          |

**Table S3:** Molecular weight analyses of polymer latex by GPC.

| <b>P(St-<i>stat</i>-nBA)/FeSiNP</b> | <b><math>M_n</math> (g/mol)</b> | <b><math>M_w</math> (g/mol)</b> | <b><math>\bar{D}</math></b> |
|-------------------------------------|---------------------------------|---------------------------------|-----------------------------|
| 5 wt%                               | 101,132                         | 413,259                         | 4.08                        |
| 10 wt%                              | 108,325                         | 428,996                         | 3.96                        |
| 20 wt%                              | 111,999                         | 364,318                         | 3.25                        |

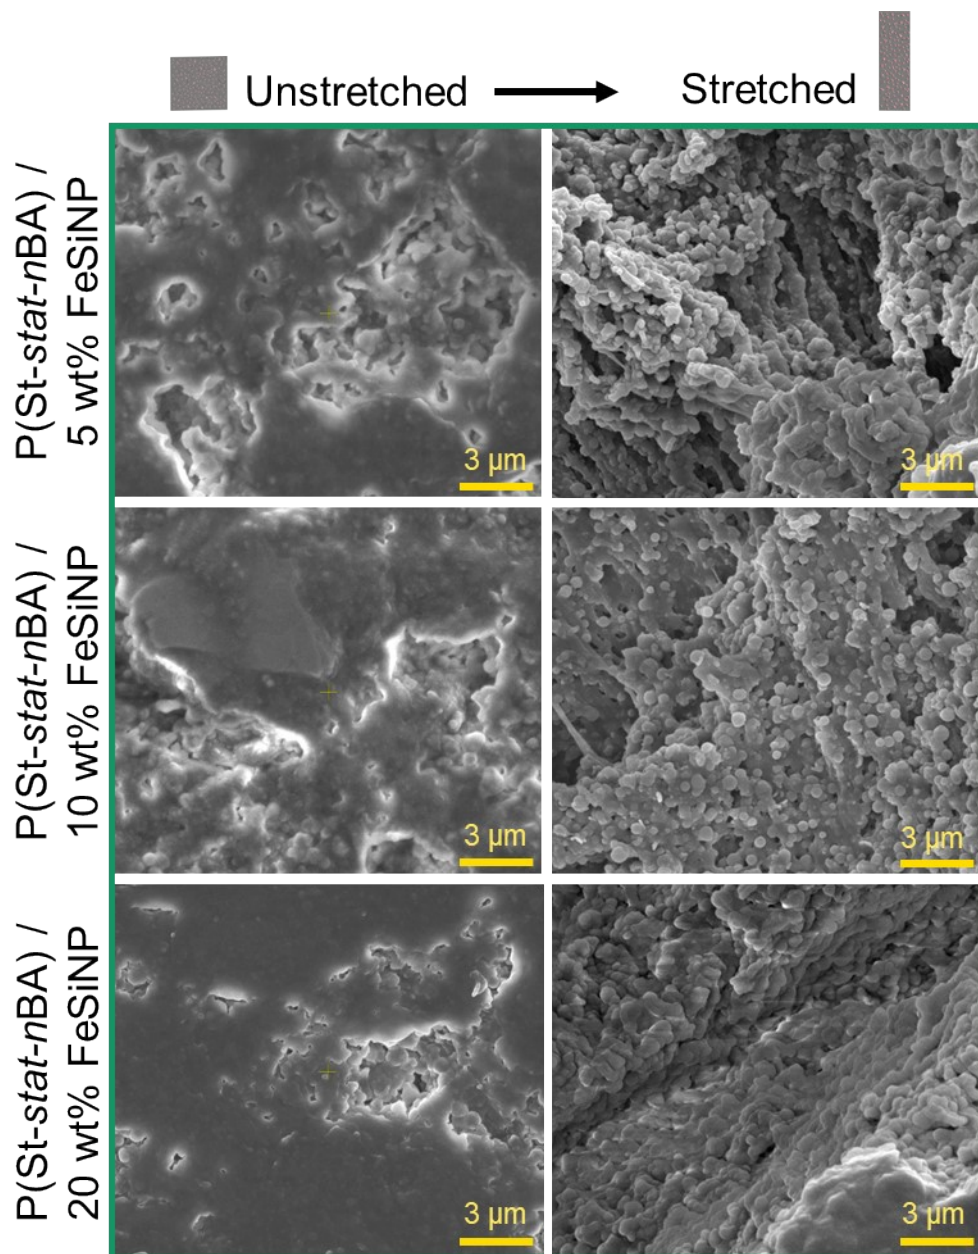

**Figure S3.** Characterisation of P(*St-stat-nBA*)/FeSiNP films – higher magnification SEM images of nanocomposite films under unstretched and stretched conditions showing overall surface features with the presence of spherical FeSiNPs in the crevices (scale bar = 3  $\mu\text{m}$ ).

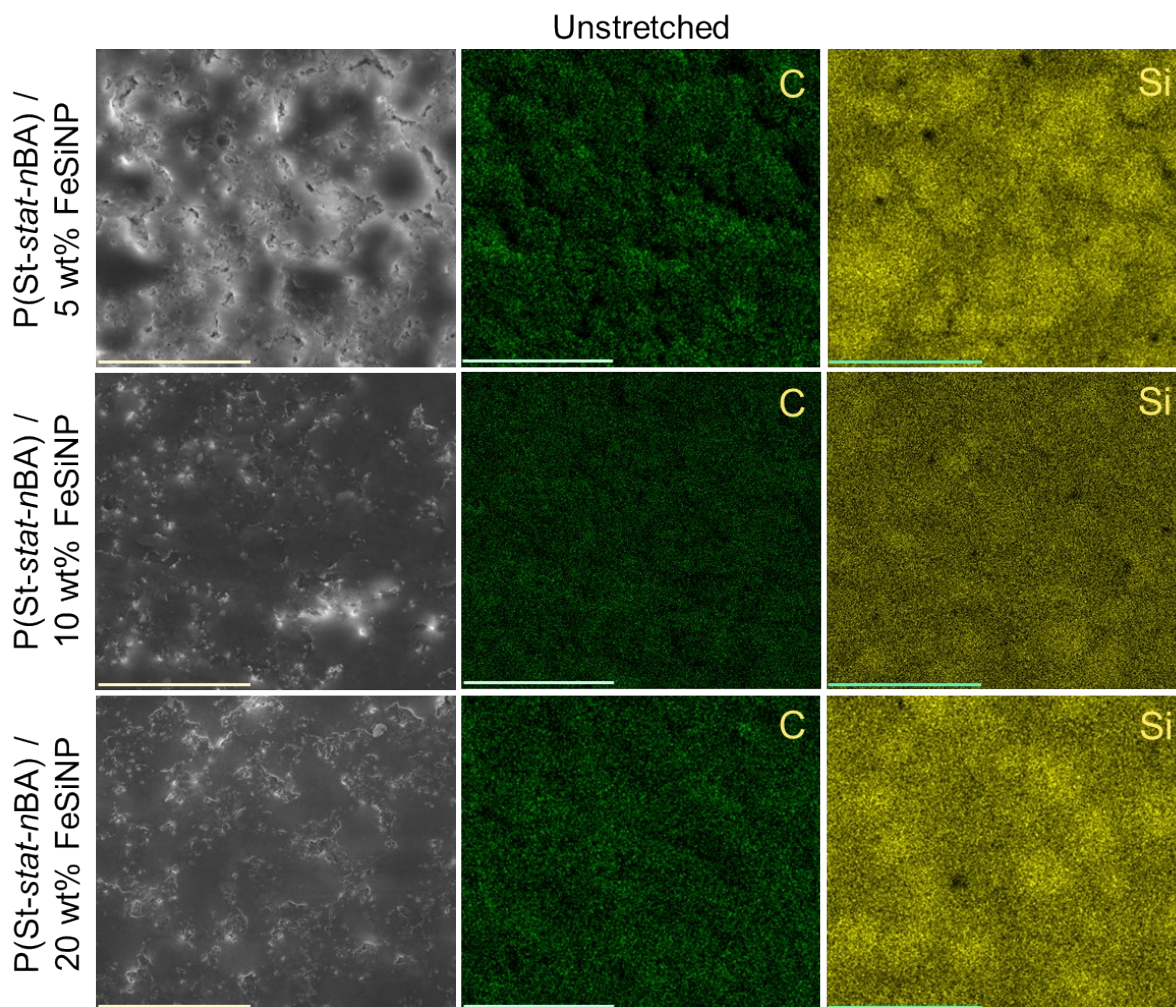

**Figure S4.** Characterisation of P(*St-stat-nBA*)/FeSiNP films- SEM images in unstretched condition and EDS mapping confirming the elements in images (scale bar = 25  $\mu$ m).



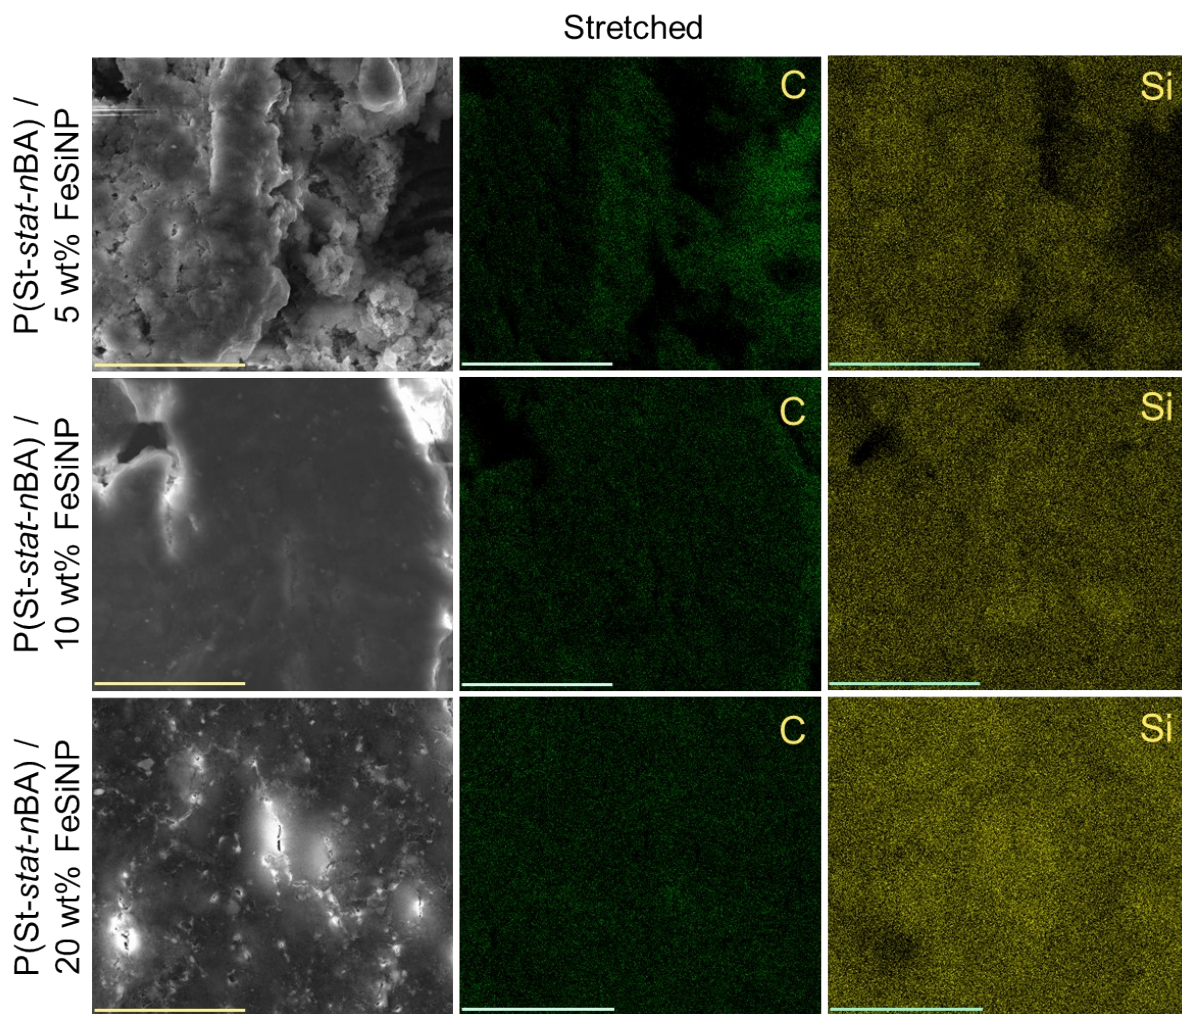

**Figure S5.** Characterisation of P(St-stat-nBA)/FeSiNP films- SEM images in stretched condition and EDS mapping confirming the elements in images (scale bar = 25  $\mu$ m).

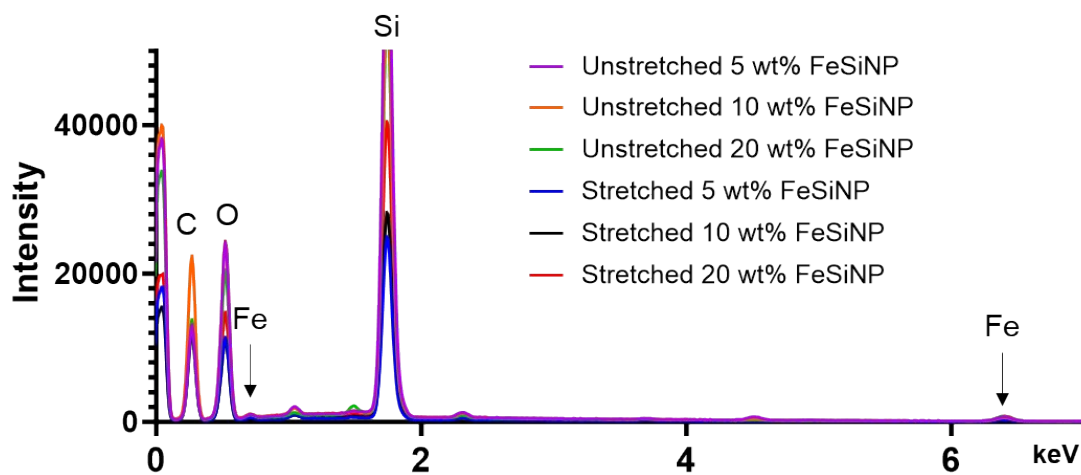

**Figure S6.** SEM-EDS spectra of the scanned images showing the presence of iron and silicon.

**Table S4:** Mechanical properties of P(St-*stat*-nBA)/FeSiNP nanocomposite films.

| NP (wt%) | Film thickness (mm) | Tensile strength (MPa) | Elongation at break (%) |
|----------|---------------------|------------------------|-------------------------|
| 5        | 58                  | 0.78 ± 0.08            | 1448                    |
| 10       | 62                  | 1.71 ± 0.21            | 847 ± 27                |
| 20       | 70                  | 1.15 ± 0.09            | 860 ± 46                |

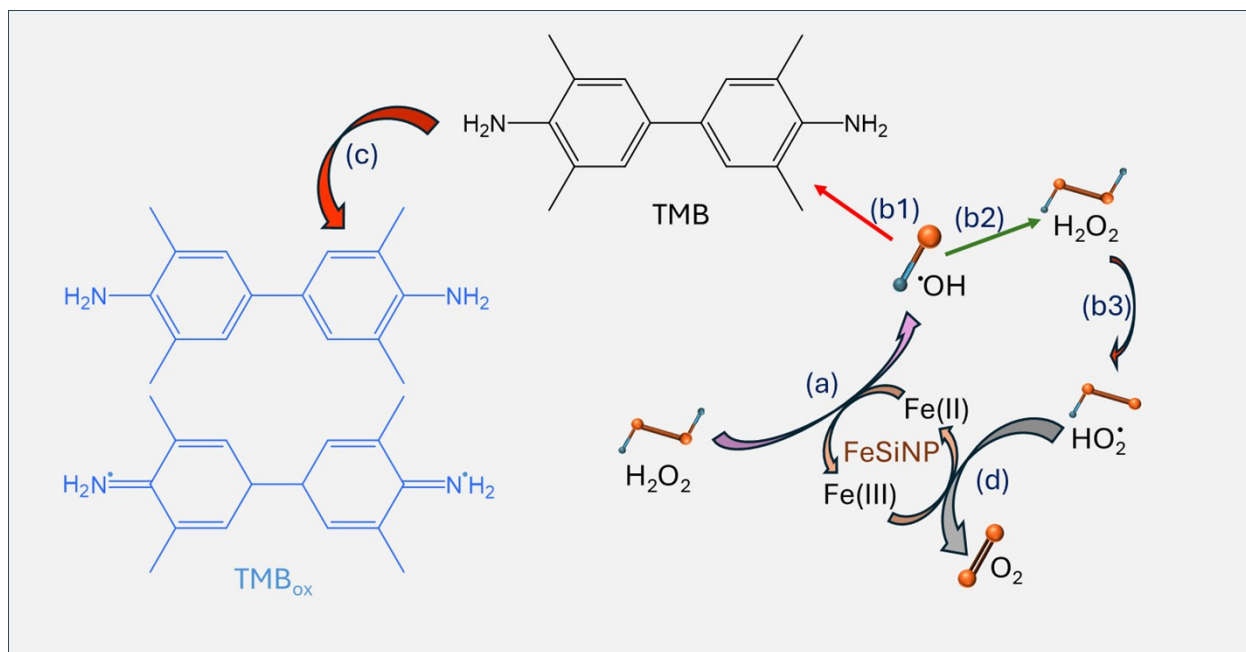**Figure S7.** The proposed mechanism of catalytic activity of FeSiNP as adapted from<sup>1</sup>.

The equations S1-4 describe the stepwise catalytic mechanism of nanozyme FeSiNPs in this study:

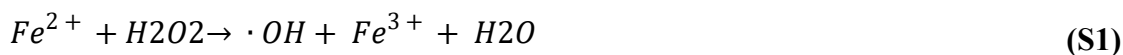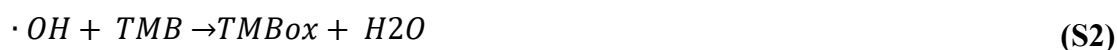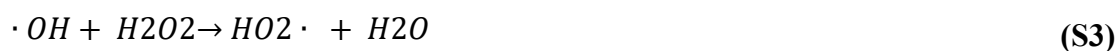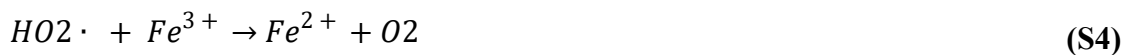

Based on the obtained data in this study and previously published report<sup>1</sup>, equation S1 is the rate limiting step.

**Table S5:** Catalytic parameter comparison among different nanozymes.

| NP              | Substrate                     | $K_m$ (mM) | $V_{max}$ ( $\mu$ M/s) | Reference    |
|-----------------|-------------------------------|------------|------------------------|--------------|
| Ir nanoparticle | H <sub>2</sub> O <sub>2</sub> | 0.27       | 1.5                    | <sup>2</sup> |
|                 | TMB                           | -          | -                      |              |
| Au nanocrystal  | H <sub>2</sub> O <sub>2</sub> | 16.0       | 0.452                  | <sup>3</sup> |
|                 | TMB                           | -          | -                      |              |

|                                                               |                               |        |         |    |
|---------------------------------------------------------------|-------------------------------|--------|---------|----|
| Pt nanoparticle                                               | H <sub>2</sub> O <sub>2</sub> | 41.8   | 0.167   | 4  |
|                                                               | TMB                           | 0.119  | 0.21    |    |
| Pt nanocrystal                                                | H <sub>2</sub> O <sub>2</sub> | 3.07   | 0.1817  | 5  |
|                                                               | TMB                           | 0.096  | 0.1414  |    |
| Cu nanocrystal                                                | H <sub>2</sub> O <sub>2</sub> | 29.16  | 0.0422  | 6  |
|                                                               | TMB                           | 0.648  | 0.0596  |    |
| Pd nanoparticle                                               | H <sub>2</sub> O <sub>2</sub> | 537.71 | 0.112   | 7  |
|                                                               | TMB                           | 0.09   | 0.177   |    |
| Fe <sub>3</sub> O <sub>4</sub> nanoparticle                   | H <sub>2</sub> O <sub>2</sub> | 10.58  | 0.1459  | 8  |
|                                                               | TMB                           | 6.22   | 0.157   |    |
| Co <sub>3</sub> O <sub>4</sub> nanoparticle                   | H <sub>2</sub> O <sub>2</sub> | 34.3   | 11.2    | 9  |
|                                                               | TMB                           | -      | -       |    |
| Fe <sub>3</sub> O <sub>4</sub> -MoS <sub>2</sub> nanoparticle | H <sub>2</sub> O <sub>2</sub> | 1.39   | 1.63    | 10 |
|                                                               | TMB                           | 0.25   | 0.111   |    |
| Fe <sub>3</sub> O <sub>4</sub> -C nanowire                    | H <sub>2</sub> O <sub>2</sub> | 0.23   | 0.0241  | 11 |
|                                                               | TMB                           | 0.20   | 0.0134  |    |
| Co-doped Fe <sub>3</sub> O <sub>4</sub> nanoparticle          | H <sub>2</sub> O <sub>2</sub> | 0.19   | 0.715   | 12 |
|                                                               | TMB                           | 1.17   | 0.379   |    |
| Fe <sub>2</sub> O <sub>3</sub> nanocomposite                  | H <sub>2</sub> O <sub>2</sub> | 0.885  | -       | 13 |
|                                                               | TMB                           | 0.582  | -       |    |
| Nanocellulose Fe <sub>3</sub> O <sub>4</sub> /Ag nanoparticle | H <sub>2</sub> O <sub>2</sub> | 8.77   | 0.107   | 14 |
|                                                               | TMB                           | 0.387  | 0.133   |    |
| FeSiNP (our work)                                             | H <sub>2</sub> O <sub>2</sub> | 0.060  | 0.00672 |    |
|                                                               | TMB                           | 7.143  | 0.01075 |    |

A lower  $K_m$  value suggests higher affinity.  $V_{max}$  is the maximum rate of conversion into the product.

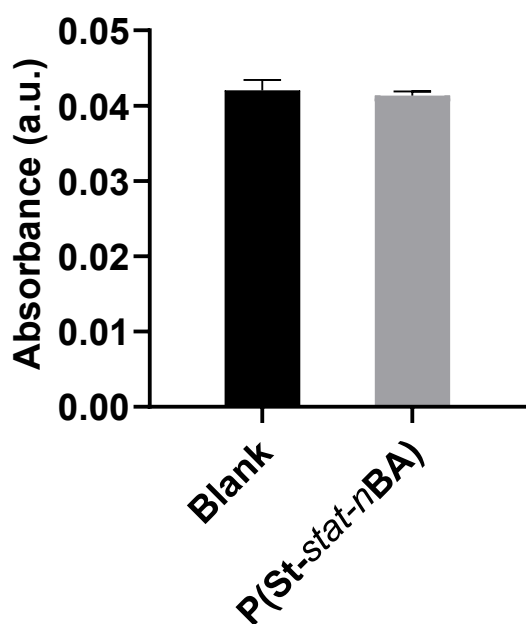

**Figure S8.** Control experiments – catalytic activity of buffer (blank) and films without FeSiNPs, showing similar absorbance values, which are negligible and considered as a baseline.

### References:

1. B. Yuan, H.-L. Chou and Y.-K. Peng, *ACS Appl. Mater. Interfaces*, 2022, **14**, 22728-22736.
2. G. Jin, J. Liu, C. Wang, W. Gu, G. Ran, B. Liu and Q. Song, *Appl. Catal. B*, 2020, **267**, 118725.
3. C.-P. Liu, T.-H. Wu, C.-Y. Liu, K.-C. Chen, Y.-X. Chen, G.-S. Chen and S.-Y. Lin, *Small*, 2017, **13**, 1700278.
4. W. Li, B. Chen, H. Zhang, Y. Sun, J. Wang, J. Zhang and Y. Fu, *Biosens. Bioelectron.*, 2015, **66**, 251-258.
5. L. Jin, Z. Meng, Y. Zhang, S. Cai, Z. Zhang, C. Li, L. Shang and Y. Shen, *ACS Appl. Mater. Interfaces*, 2017, **9**, 10027-10033.
6. L. Hu, Y. Yuan, L. Zhang, J. Zhao, S. Majeed and G. Xu, *Anal. Chim. Acta*, 2013, **762**, 83-86.
7. S.-B. He, F.-Q. Chen, L.-F. Xiu, H.-P. Peng, H.-H. Deng, A.-L. Liu, W. Chen and G.-L. Hong, *Anal. Bioanal. Chem.*, 2020, **412**, 499-506.
8. W. Li, G.-C. Fan, F. Gao, Y. Cui, W. Wang and X. Luo, *Biosens. Bioelectron.*, 2019, **127**, 64-71.
9. J. Mu, L. Zhang, M. Zhao and Y. Wang, *J. Mol. Catal. A Chem.*, 2013, **378**, 30-37.
10. F. Wei, X. Cui, Z. Wang, C. Dong, J. Li and X. Han, *Chem. Eng. J.*, 2021, **408**, 127240.
11. R. Zhang, N. Lu, J. Zhang, R. Yan, J. Li, L. Wang, N. Wang, M. Lv and M. Zhang, *Biosens. Bioelectron.*, 2020, **150**, 111881.
12. Y. Wang, H. Li, L. Guo, Q. Jiang and F. Liu, *RSC Adv.*, 2019, **9**, 18815-18822.
13. X. Liu, T. Gao, H. Liu, Y. Fang and L. Wang, *J. Exp. Nanosci.*, 2022, **17**, 75-85.
14. S. A. Geleto, A. M. Ariti, B. T. Gutema, E. M. Abda, A. A. Abiye, S. M. Abay, M. L. Mekonnen and Y. A. Workie, *ACS Omega*, 2023 **8**, 48764–48774.
